# Supplementary material for: The Identification of a Tumor Infiltration CD8+ T-Cell Gene Signature That Can Potentially Improve the Prognosis and Prediction of Immunization Responses in Papillary Renal Cell Carcinoma
Source: Front Oncol. 2021 Nov 10;11:757641. doi: 10.3389/fonc.2021.757641 (PMC8631402; doi:10.3389/fonc.2021.757641)
Supplement: Supplementary Data Sheet 2 — Supporting data for Figure 3A . [file DataSheet_2.csv]

	beta	HR (95% CI)	z	wald.test	P-value
RP11-347P5.1	4.7651	117.3427	3.8007	14.45	0.0001
RAD23A	1.627	5.0887	3.2887	10.82	0.001
LINC01420	1.57	4.8068	4.9778	24.78	0
LYAR	1.5226	4.5839	4.6068	21.22	0
NCL	1.4977	4.4715	4.2643	18.18	0
OSTC	1.4293	4.1758	4.1242	17.01	0
PTGES3	1.3358	3.803	3.7006	13.69	0.0002
EIF3E	1.3123	3.7148	4.6278	21.42	0
TTN	1.2859	3.618	0.9665	0.93	0.3338
YWHAZ	1.2725	3.5698	3.7458	14.03	0.0002
CALR	1.2172	3.3778	3.3333	11.11	0.0009
HNRNPL	1.2065	3.3416	2.1602	4.67	0.0308
ACTR3	1.187	3.2773	3.276	10.73	0.0011
YBX1	1.1083	3.0292	3.0363	9.22	0.0024
PNRC1	1.0981	2.9984	3.8373	14.73	0.0001
SNX3	1.0956	2.991	3.2799	10.76	0.001
RNF115	1.0107	2.7475	2.1948	4.82	0.0282
AP3S1	1.0005	2.7197	3.3426	11.17	0.0008
DEK	0.9795	2.6631	3.7418	14	0.0002
ARPC5	0.962	2.617	2.7186	7.39	0.0066
JTB	0.9616	2.6158	2.872	8.25	0.0041
SFT2D1	0.9353	2.5479	2.1718	4.72	0.0299
PABPC1	0.9331	2.5425	5.8218	33.89	0
SNRPB2	0.8904	2.4361	2.6401	6.97	0.0083
HAX1	0.8834	2.419	2.4574	6.04	0.014
CDK12	0.8817	2.415	2.7901	7.78	0.0053
HSP90B1	0.8754	2.3998	3.607	13.01	0.0003
KIAA1551	0.8676	2.3813	4.0374	16.3	0.0001
DDX18	0.859	2.3609	2.5895	6.71	0.0096
BTG1	0.8568	2.3556	3.7176	13.82	0.0002
UBC	0.8496	2.3387	2.6384	6.96	0.0083
LEPROTL1	0.8186	2.2673	2.5794	6.65	0.0099
TMPO	0.8178	2.2655	3.2782	10.75	0.001
SP100	0.8178	2.2654	1.8669	3.49	0.0619
TIGIT	0.805	2.2366	3.8403	14.75	0.0001
PMAIP1	0.7932	2.2105	5.0584	25.59	0
PRDX6	0.7921	2.2081	3.055	9.33	0.0023
SERP1	0.7841	2.1905	2.595	6.73	0.0095
SPCS2	0.7836	2.1894	1.8267	3.34	0.0677
PPP1R18	0.7681	2.1556	3.9637	15.71	0.0001
PRRC2C	0.767	2.1533	3.3603	11.29	0.0008
H2AFZ	0.767	2.1532	2.3598	5.57	0.0183
SMC4	0.7638	2.1463	4.0283	16.23	0.0001
LYST	0.7449	2.1062	2.1753	4.73	0.0296
PTP4A2	0.7365	2.0886	2.4318	5.91	0.015
HSPD1	0.7362	2.0879	3.5634	12.7	0.0004
RPS18	0.7177	2.0498	3.3492	11.22	0.0008
CD164	0.7041	2.022	2.3831	5.68	0.0172
RPLP0	0.7007	2.0152	3.4929	12.2	0.0005
TMEM14B	0.6964	2.0065	2.3841	5.68	0.0171
GNB2L1	0.6955	2.0048	2.3464	5.51	0.019
HMGB2	0.689	1.9917	2.9232	8.54	0.0035
DDX21	0.6868	1.9873	3.3181	11.01	0.0009
TPR	0.6826	1.979	2.6769	7.17	0.0074
RPS4X	0.6741	1.9623	3.1229	9.75	0.0018
RPL7	0.6737	1.9614	2.9397	8.64	0.0033
PSMA1	0.672	1.9582	1.674	2.8	0.0941
BTF3	0.669	1.9523	2.4016	5.77	0.0163
ARF1	0.6685	1.9513	1.2928	1.67	0.1961
ARID4B	0.6639	1.9424	2.0707	4.29	0.0384
TMEM2	0.6603	1.9353	3.2452	10.53	0.0012
EIF3M	0.6517	1.9188	1.8262	3.33	0.0678
HNRNPUL1	0.6515	1.9184	1.8829	3.55	0.0597
SEPT2	0.6489	1.9134	2.1654	4.69	0.0304
RP11-796E2.4	0.6458	1.9074	0.8179	0.67	0.4134
PIP4K2A	0.6418	1.8999	2.3604	5.57	0.0183
RSL24D1	0.6397	1.8959	2.1681	4.7	0.0302
SH3KBP1	0.6393	1.8951	2.9139	8.49	0.0036
FAM3C	0.6306	1.8787	3.0858	9.52	0.002
RPL31	0.6222	1.863	2.7903	7.79	0.0053
ANKRD36	0.6184	1.8559	1.0638	1.13	0.2874
GNG5	0.6174	1.8542	1.703	2.9	0.0886
HSP90AA1	0.6174	1.8541	2.5068	6.28	0.0122
IFI16	0.6172	1.8538	3.6432	13.27	0.0003
NUCKS1	0.6158	1.8511	1.9548	3.82	0.0506
RPS8	0.5987	1.8198	2.5187	6.34	0.0118
ITGA4	0.5959	1.8146	2.3624	5.58	0.0182
SRP9	0.5927	1.8089	1.7808	3.17	0.075
HSPE1	0.5786	1.7835	2.6879	7.22	0.0072
PYHIN1	0.5698	1.768	2.6876	7.22	0.0072
DNAJB4	0.5623	1.7548	2.6188	6.86	0.0088
FTH1	0.5565	1.7446	2.8288	8	0.0047
ZC3H7A	0.5553	1.7425	1.4816	2.2	0.1384
WHSC1L1	0.5517	1.7361	1.8495	3.42	0.0644
STAT3	0.5513	1.7355	1.8893	3.57	0.0588
RPL8	0.5509	1.7348	2.177	4.74	0.0295
MZT2B	0.5504	1.7339	2.6266	6.9	0.0086
DGKZ	0.5489	1.7314	1.8669	3.49	0.0619
CIR1	0.5487	1.7311	1.8824	3.54	0.0598
RPS5	0.5465	1.7272	2.271	5.16	0.0231
LAT	0.543	1.7211	0.8545	0.73	0.3928
RNF19A	0.5422	1.7198	2.3264	5.41	0.02
NUFIP2	0.5405	1.7169	1.8305	3.35	0.0672
PRELID1	0.5367	1.7103	2.2882	5.24	0.0221
PRNP	0.5312	1.701	2.0889	4.36	0.0367
RPL10A	0.5183	1.6792	1.777	3.16	0.0756
RPL10	0.5158	1.675	1.9373	3.75	0.0527
KDM5A	0.5151	1.6739	1.7318	3	0.0833
IRF1	0.5075	1.6611	2.6706	7.13	0.0076
SEP15	0.5074	1.661	1.5579	2.43	0.1193
TNFRSF9	0.5036	1.6547	2.9731	8.84	0.0029
FKBP11	0.5002	1.649	2.278	5.19	0.0227
LITAF	0.4974	1.6445	1.9326	3.74	0.0533
IKZF3	0.4847	1.6237	2.4483	5.99	0.0144
KLRD1	0.476	1.6096	0.7604	0.58	0.447
RANBP1	0.4737	1.6059	1.394	1.94	0.1633
RPS27A	0.4729	1.6047	2.0572	4.23	0.0397
PLP2	0.4728	1.6046	2.4765	6.13	0.0133
LINC00152	0.4707	1.6011	2.2654	5.13	0.0235
HOPX	0.4678	1.5965	3.0426	9.26	0.0023
HSPH1	0.4659	1.5934	2.2175	4.92	0.0266
RPS2	0.4628	1.5884	2.1457	4.6	0.0319
RNF213	0.4615	1.5864	2.2402	5.02	0.0251
COTL1	0.4605	1.5849	2.3217	5.39	0.0202
GRN	0.4554	1.5768	2.4558	6.03	0.0141
OST4	0.4548	1.5759	1.5633	2.44	0.118
HSP90AB1	0.4533	1.5735	3.5647	12.71	0.0004
ISG20	0.4527	1.5726	1.8109	3.28	0.0702
TSPAN14	0.4518	1.5711	2.2243	4.95	0.0261
YME1L1	0.4496	1.5677	1.6215	2.63	0.1049
GRAP2	0.4476	1.5646	0.8552	0.73	0.3924
ZFAND5	0.4437	1.5585	1.5328	2.35	0.1253
BCLAF1	0.4377	1.5491	1.2914	1.67	0.1966
ZBTB38	0.4377	1.5491	2.2401	5.02	0.0251
UBE2B	0.4375	1.5489	1.3983	1.96	0.162
MYH9	0.4369	1.5479	1.8531	3.43	0.0639
ANXA6	0.4335	1.5426	2.4715	6.11	0.0135
SSR4	0.4296	1.5366	1.8181	3.31	0.069
CD3G	0.4288	1.5354	1.8879	3.56	0.059
RPLP1	0.4265	1.5319	2.0661	4.27	0.0388
RPL35A	0.4211	1.5237	1.7426	3.04	0.0814
RPS11	0.421	1.5235	1.565	2.45	0.1176
STAT1	0.4205	1.5228	2.8042	7.86	0.005
PTMA	0.4203	1.5224	1.4641	2.14	0.1432
SNRNP200	0.4153	1.5148	1.4733	2.17	0.1407
EPS15	0.4136	1.5122	1.1702	1.37	0.2419
TRA2B	0.4106	1.5077	0.9978	1	0.3184
FNBP1	0.4099	1.5066	1.8246	3.33	0.0681
RPL39	0.4093	1.5057	2.1191	4.49	0.0341
TUBA4A	0.4084	1.5044	2.2406	5.02	0.0251
ANKRD36C	0.4067	1.5018	0.6777	0.46	0.4979
M6PR	0.4043	1.4983	1.8738	3.51	0.061
NOP10	0.4017	1.4944	1.3793	1.9	0.1678
ATF4	0.4015	1.494	1.6314	2.66	0.1028
UBE2N	0.3953	1.4848	0.9184	0.84	0.3584
SNRPG	0.3943	1.4834	1.3294	1.77	0.1837
DNAJA1	0.3913	1.4789	1.3928	1.94	0.1637
NBEAL1	0.3871	1.4727	1.2487	1.56	0.2118
PPT1	0.3871	1.4727	1.3876	1.93	0.1652
CCDC88C	0.3819	1.4651	1.6783	2.82	0.0933
ATP1B3	0.3779	1.4593	2.0243	4.1	0.0429
EOMES	0.3764	1.457	1.7997	3.24	0.0719
NMT1	0.3752	1.4554	0.8838	0.78	0.3768
CD99	0.3734	1.4526	1.7462	3.05	0.0808
SIRPG	0.3714	1.4498	2.1533	4.64	0.0313
ZNF90	0.3698	1.4475	1.696	2.88	0.0899
RBBP4	0.3692	1.4466	1.1047	1.22	0.2693
RPL12	0.3669	1.4432	1.6975	2.88	0.0896
ITGB1	0.3654	1.4411	2.2559	5.09	0.0241
SAMD9	0.362	1.4362	1.6537	2.73	0.0982
GBP5	0.3603	1.4338	2.2613	5.11	0.0237
PRDM1	0.3586	1.4314	1.634	2.67	0.1023
DNAJC7	0.3585	1.4312	0.8391	0.7	0.4014
DNAJB6	0.3533	1.4237	0.939	0.88	0.3477
RPS14	0.3522	1.4222	1.4742	2.17	0.1404
CKLF	0.352	1.4218	1.7336	3.01	0.083
TNFAIP3	0.3499	1.4189	1.9023	3.62	0.0571
ERAP2	0.3496	1.4185	2.6627	7.09	0.0078
GPATCH8	0.3458	1.4131	1.2874	1.66	0.198
FYN	0.3403	1.4054	1.8505	3.42	0.0642
ARPC3	0.3395	1.4042	1.1978	1.43	0.231
CH17-189H20.1	0.3371	1.4009	1.1459	1.31	0.2518
RPL22	0.3314	1.393	1.0555	1.11	0.2912
OPTN	0.3293	1.39	1.3604	1.85	0.1737
WIPF1	0.3276	1.3876	1.3937	1.94	0.1634
IQGAP1	0.324	1.3827	1.5046	2.26	0.1324
TOX	0.3234	1.3818	2.2435	5.03	0.0249
PARP14	0.3223	1.3804	1.317	1.73	0.1879
XPO1	0.318	1.3743	1.0407	1.08	0.298
ARRDC3	0.3173	1.3734	2.0019	4.01	0.0453
NASP	0.3171	1.3732	1.2934	1.67	0.1959
CHURC1	0.3128	1.3672	1.1304	1.28	0.2583
RPL3	0.3109	1.3647	1.0236	1.05	0.306
RPL18A	0.3064	1.3585	1.4089	1.98	0.1589
ETS1	0.3063	1.3584	1.9598	3.84	0.05
S100A10	0.3057	1.3576	1.5566	2.42	0.1196
FAM133B	0.3029	1.3538	0.8675	0.75	0.3857
DAD1	0.3028	1.3537	0.8911	0.79	0.3729
AP2S1	0.3024	1.3531	1.0623	1.13	0.2881
RASGRP1	0.302	1.3526	1.4827	2.2	0.1381
CMTM6	0.3009	1.351	1.0693	1.14	0.2849
REL	0.2898	1.3361	0.8277	0.69	0.4079
UXT	0.2867	1.3321	0.8545	0.73	0.3928
TAP1	0.2833	1.3275	1.4441	2.09	0.1487
TSPYL2	0.2817	1.3254	1.2606	1.59	0.2075
TMEM165	0.2811	1.3245	0.7809	0.61	0.4349
CD27	0.28	1.3231	2.4789	6.15	0.0132
PIM1	0.279	1.3217	2.0444	4.18	0.0409
LCK	0.2759	1.3178	1.6524	2.73	0.0985
RPL32	0.2754	1.3171	1.1321	1.28	0.2576
SLFN5	0.275	1.3165	1.2871	1.66	0.198
RASA2	0.2746	1.316	1.1005	1.21	0.2711
ZC3HAV1	0.2744	1.3157	1.04	1.08	0.2983
TAGLN2	0.2721	1.3127	1.3309	1.77	0.1832
CREM	0.2715	1.3119	1.0852	1.18	0.2778
RPS19	0.2706	1.3108	1.5755	2.48	0.1151
CSNK1A1	0.2705	1.3107	1.1849	1.4	0.2361
RPS13	0.2696	1.3094	1.027	1.05	0.3044
IFITM2	0.2691	1.3088	2.1533	4.64	0.0313
PRKCH	0.269	1.3087	1.2821	1.64	0.1998
AKNA	0.2664	1.3052	1.4792	2.19	0.1391
UCP2	0.2631	1.3009	2.3177	5.37	0.0205
RPL11	0.2605	1.2975	0.9646	0.93	0.3348
RPS15	0.2567	1.2927	1.1486	1.32	0.2507
EMB	0.2558	1.2915	1.3288	1.77	0.1839
WNK1	0.2555	1.291	1.7502	3.06	0.0801
H3F3B	0.2549	1.2903	1.0475	1.1	0.2949
LINC01116	0.2531	1.2881	2.5168	6.33	0.0118
SYTL3	0.2526	1.2874	1.1402	1.3	0.2542
DDX3X	0.2524	1.2871	1.044	1.09	0.2965
IFITM1	0.2489	1.2826	3.0342	9.21	0.0024
FYB	0.2437	1.276	1.4549	2.12	0.1457
BIRC6	0.2431	1.2752	0.9257	0.86	0.3546
SRSF7	0.2429	1.275	0.8159	0.67	0.4146
TGOLN2	0.2425	1.2744	1.1993	1.44	0.2304
BIRC3	0.2409	1.2724	2.2624	5.12	0.0237
RPS21	0.2402	1.2715	1.2092	1.46	0.2266
YWHAQ	0.2401	1.2713	0.8405	0.71	0.4006
HNRNPLL	0.2386	1.2695	0.6018	0.36	0.5473
CD8A	0.2349	1.2648	2.1253	4.52	0.0336
PSMA7	0.2339	1.2636	0.7533	0.57	0.4513
GBP2	0.2336	1.2631	1.4791	2.19	0.1391
CD8B	0.2325	1.2618	1.8389	3.38	0.0659
DUSP4	0.2326	1.2618	1.961	3.85	0.0499
ZNF638	0.2318	1.2609	0.688	0.47	0.4915
ASH1L	0.231	1.2599	1.048	1.1	0.2947
CHST11	0.2274	1.2553	1.2823	1.64	0.1997
AP2M1	0.2254	1.2528	0.6355	0.4	0.5251
TMEM123	0.224	1.2511	0.983	0.97	0.3256
EIF3A	0.2219	1.2484	1.069	1.14	0.2851
CLEC2D	0.2211	1.2475	1.0336	1.07	0.3013
DDIT4	0.2206	1.2468	1.8646	3.48	0.0622
CLIC1	0.2201	1.2462	0.7921	0.63	0.4283
IL6ST	0.2188	1.2446	1.1013	1.21	0.2707
IDS	0.2185	1.2442	1.3048	1.7	0.192
PRPF38B	0.2122	1.2364	0.8277	0.69	0.4078
ANAPC11	0.2119	1.2361	0.8144	0.66	0.4154
NPIPB5	0.2114	1.2354	0.5515	0.3	0.5813
SEC61G	0.2104	1.2342	0.9355	0.88	0.3495
SEC62	0.2062	1.229	0.7521	0.57	0.452
RPS6	0.2052	1.2278	0.7651	0.59	0.4442
GZMM	0.205	1.2275	1.0838	1.17	0.2785
NKG7	0.2039	1.2261	2.3159	5.36	0.0206
ITM2A	0.2034	1.2256	2.0437	4.18	0.041
RPL35	0.2014	1.2231	1.0007	1	0.317
FUS	0.1994	1.2206	0.6846	0.47	0.4936
CFL1	0.1986	1.2197	0.5151	0.27	0.6065
RPS3A	0.1966	1.2173	0.7935	0.63	0.4275
SRRM2	0.1965	1.2172	0.8345	0.7	0.404
SRSF2	0.195	1.2153	0.7207	0.52	0.4711
KMT2A	0.1937	1.2138	0.7036	0.5	0.4817
TMBIM6	0.1936	1.2136	0.6966	0.49	0.4861
IRF2	0.1921	1.2118	0.5282	0.28	0.5974
DNAJB1	0.1912	1.2108	0.9196	0.85	0.3578
BANF1	0.1908	1.2102	0.6697	0.45	0.5031
IKZF1	0.1891	1.2081	0.8057	0.65	0.4204
GZMK	0.1886	1.2075	1.6209	2.63	0.105
NABP1	0.1812	1.1987	0.9137	0.83	0.3609
RPL36	0.1781	1.195	0.8909	0.79	0.373
USP34	0.1758	1.1922	0.843	0.71	0.3992
SELM	0.1751	1.1914	1.7954	3.22	0.0726
BRD2	0.1741	1.1902	0.5701	0.32	0.5686
GABPB1-AS1	0.1732	1.1891	0.8746	0.76	0.3818
PRPF4B	0.1727	1.1885	0.5831	0.34	0.5598
NDUFA4L2	0.1717	1.1874	2.3919	5.72	0.0168
VDAC2	0.1712	1.1867	0.6147	0.38	0.5387
MT2A	0.17	1.1853	1.8412	3.39	0.0656
LGALS1	0.1692	1.1843	1.2659	1.6	0.2055
TLN1	0.1648	1.1791	0.5753	0.33	0.5651
BATF	0.1643	1.1786	1.2589	1.58	0.2081
CSTB	0.1621	1.1759	0.9322	0.87	0.3512
SLC2A3	0.162	1.1759	1.2066	1.46	0.2276
GIMAP7	0.1612	1.1749	1.1652	1.36	0.2439
TPI1	0.1568	1.1697	0.5646	0.32	0.5723
APOBEC3G	0.1567	1.1696	0.7394	0.55	0.4597
HLA-E	0.1563	1.1692	0.6562	0.43	0.5117
CCL5	0.1548	1.1674	1.6679	2.78	0.0953
PRKAR1A	0.154	1.1665	0.5658	0.32	0.5716
ARL4C	0.1511	1.1632	1.6122	2.6	0.1069
CD69	0.1466	1.1579	0.7336	0.54	0.4632
BCAP31	0.1461	1.1573	0.498	0.25	0.6185
CYTIP	0.1448	1.1558	0.8836	0.78	0.3769
KRT10	0.1425	1.1531	0.7058	0.5	0.4803
CD46	0.1419	1.1525	0.6056	0.37	0.5448
MCL1	0.1414	1.1519	0.627	0.39	0.5307
CCDC85B	0.1399	1.1501	0.7349	0.54	0.4624
BTG2	0.1349	1.1445	1.0486	1.1	0.2944
BBX	0.1347	1.1442	0.5822	0.34	0.5604
TRBC2	0.1338	1.1432	1.287	1.66	0.1981
SMG1	0.1318	1.1409	0.5327	0.28	0.5943
IFRD1	0.129	1.1377	0.6182	0.38	0.5365
SOD2	0.1287	1.1374	1.0217	1.04	0.3069
CBX3	0.1282	1.1368	0.4743	0.22	0.6353
LTB	0.1273	1.1358	0.9468	0.9	0.3437
LDHB	0.1268	1.1352	0.6383	0.41	0.5233
ATXN1	0.126	1.1343	0.3669	0.13	0.7137
FTL	0.1249	1.133	1.1369	1.29	0.2556
UTRN	0.1222	1.13	0.7208	0.52	0.471
TMEM50A	0.1194	1.1268	0.3434	0.12	0.7313
RHOG	0.1184	1.1257	0.4875	0.24	0.6259
SAMSN1	0.1183	1.1256	0.6525	0.43	0.5141
ZFP36L2	0.1174	1.1246	0.5348	0.29	0.5928
SH3BGRL3	0.1168	1.1239	0.5722	0.33	0.5672
RUNX3	0.115	1.1219	0.7091	0.5	0.4782
BTG3	0.1106	1.1169	0.8703	0.76	0.3841
PCNP	0.1049	1.1106	0.3533	0.12	0.7239
RGS10	0.1048	1.1105	0.7182	0.52	0.4727
RAC2	0.1044	1.1101	0.812	0.66	0.4168
C6orf62	0.1038	1.1094	0.2971	0.09	0.7664
EIF1B	0.0975	1.1024	0.3745	0.14	0.708
TGFBI	0.0953	1.0999	0.7602	0.58	0.4471
RWDD1	0.0917	1.0961	0.2612	0.07	0.794
GOLGA4	0.0915	1.0958	0.4276	0.18	0.6689
BPTF	0.0879	1.0919	0.3745	0.14	0.708
USP16	0.0872	1.0911	0.3151	0.1	0.7527
PDE4DIP	0.0861	1.0899	0.2394	0.06	0.8108
SON	0.0847	1.0884	0.3797	0.14	0.7041
DUSP2	0.0833	1.0869	0.7266	0.53	0.4675
HSPA8	0.0831	1.0867	0.5101	0.26	0.61
RGS2	0.0821	1.0856	0.7163	0.51	0.4738
RPS25	0.082	1.0854	0.3173	0.1	0.7511
LCP2	0.0793	1.0826	0.4086	0.17	0.6829
IFITM3	0.077	1.0801	0.5072	0.26	0.612
PSMB9	0.077	1.0801	0.4697	0.22	0.6386
RICTOR	0.0768	1.0798	0.2255	0.05	0.8216
VCP	0.0728	1.0755	0.1869	0.03	0.8518
CARD16	0.0708	1.0733	0.4163	0.17	0.6772
PCSK7	0.07	1.0725	0.1422	0.02	0.887
ATRX	0.0626	1.0646	0.227	0.05	0.8204
HSPA6	0.0613	1.0632	0.5438	0.3	0.5866
RPL13	0.0612	1.0631	0.2969	0.09	0.7665
AFF4	0.0608	1.0627	0.273	0.07	0.7849
SAA1	0.0575	1.0592	1.1077	1.23	0.268
JUNB	0.0574	1.0591	0.4753	0.23	0.6346
SAA2	0.057	1.0587	0.6749	0.46	0.4997
S100A11	0.0557	1.0572	0.3349	0.11	0.7377
SLC38A2	0.0506	1.0519	0.2221	0.05	0.8242
ATP6V1G1	0.0501	1.0513	0.1327	0.02	0.8945
ERICH1	0.0494	1.0507	0.1188	0.01	0.9055
TMEM14C	0.0436	1.0446	0.1483	0.02	0.8821
CORO1A	0.0401	1.0409	0.291	0.08	0.7711
CXCR4	0.037	1.0377	0.3298	0.11	0.7415
RBM25	0.0364	1.0371	0.1448	0.02	0.8849
ARID5B	0.034	1.0346	0.1758	0.03	0.8605
DRAP1	0.0324	1.0329	0.1135	0.01	0.9097
AKAP13	0.03	1.0305	0.1065	0.01	0.9152
SPP1	0.0286	1.029	0.2753	0.08	0.7831
TUBA1A	0.0251	1.0254	0.1595	0.03	0.8733
SLA	0.0241	1.0244	0.135	0.02	0.8926
ARHGDIB	0.0214	1.0216	0.1395	0.02	0.8891
RPS9	0.0213	1.0215	0.0853	0.01	0.932
MRPS6	0.0211	1.0214	0.1196	0.01	0.9048
JAK1	0.0187	1.0189	0.0865	0.01	0.9311
LSM7	0.0186	1.0188	0.0758	0.01	0.9395
LUC7L3	0.0175	1.0176	0.1172	0.01	0.9067
BTN3A1	0.016	1.0162	0.0659	0	0.9475
TGFBR2	0.014	1.0141	0.0951	0.01	0.9242
FXYD5	0.013	1.0131	0.1125	0.01	0.9104
LRRFIP1	0.0124	1.0125	0.0519	0	0.9586
ODF2L	0.012	1.0121	0.0427	0	0.9659
CELF1	0.0108	1.0108	0.0241	0	0.9807
C11orf31	0.0099	1.0099	0.0316	0	0.9748
RPS4Y1	0.0088	1.0088	0.1444	0.02	0.8852
CCL4	0.0069	1.0069	0.0483	0	0.9614
RARRES3	0.0069	1.0069	0.048	0	0.9617
CD52	0.0059	1.0059	0.0576	0	0.9541
ARHGAP9	0.0023	1.0023	0.0109	0	0.9913
ROCK1	0.0021	1.0021	0.0088	0	0.993
SLC4A7	0.0013	1.0013	0.0065	0	0.9948
JUN	0.0012	1.0012	0.0081	0	0.9935
RSBN1	-0.0007	0.9993	-0.0022	0	0.9982
C3	-0.004	0.996	-0.0637	0	0.9492
DUSP1	-0.009	0.9911	-0.0901	0.01	0.9282
RCSD1	-0.009	0.991	-0.041	0	0.9673
ATF7IP	-0.0112	0.9889	-0.0375	0	0.9701
C1QB	-0.0125	0.9876	-0.1455	0.02	0.8843
NNMT	-0.0192	0.981	-0.3128	0.1	0.7544
TMSB4X	-0.0204	0.9799	-0.1064	0.01	0.9152
CYTH4	-0.0205	0.9797	-0.1142	0.01	0.9091
RABAC1	-0.0223	0.978	-0.0825	0.01	0.9343
APOE	-0.0228	0.9775	-0.3101	0.1	0.7565
GOLGA8B	-0.0242	0.9761	-0.2016	0.04	0.8403
TSC22D3	-0.0246	0.9757	-0.1745	0.03	0.8615
SLC38A1	-0.0248	0.9755	-0.137	0.02	0.891
PNISR	-0.0271	0.9733	-0.1603	0.03	0.8727
DHRS7	-0.0279	0.9725	-0.1217	0.01	0.9031
CD53	-0.0294	0.971	-0.239	0.06	0.8111
EIF5A	-0.0304	0.97	-0.1069	0.01	0.9149
SERPINA1	-0.0307	0.9698	-0.3867	0.15	0.699
HLA-DQB1	-0.0313	0.9692	-0.306	0.09	0.7596
ANXA1	-0.0336	0.967	-0.3004	0.09	0.7639
OAZ1	-0.0345	0.9661	-0.0993	0.01	0.9209
DDX6	-0.0358	0.9648	-0.1144	0.01	0.9089
SYNE1	-0.0363	0.9643	-0.178	0.03	0.8588
PPP1R10	-0.0367	0.964	-0.1405	0.02	0.8883
NR4A1	-0.0373	0.9634	-0.4781	0.23	0.6326
ATP6AP2	-0.0382	0.9625	-0.1368	0.02	0.8912
HBB	-0.0382	0.9625	-0.4947	0.24	0.6208
RAB5C	-0.0389	0.9619	-0.1294	0.02	0.8971
TXK	-0.0401	0.9607	-0.0915	0.01	0.9271
NFKBIA	-0.0411	0.9597	-0.1688	0.03	0.866
GALM	-0.0433	0.9576	-0.2346	0.06	0.8145
RPL34	-0.0445	0.9564	-0.1924	0.04	0.8474
LYZ	-0.0452	0.9558	-0.5896	0.35	0.5555
ALOX5AP	-0.0479	0.9532	-0.3686	0.14	0.7124
MYEOV2	-0.0508	0.9505	-0.2036	0.04	0.8387
S100A4	-0.0508	0.9505	-0.4066	0.17	0.6843
TXNIP	-0.0511	0.9501	-0.3172	0.1	0.7511
MACF1	-0.0515	0.9498	-0.2004	0.04	0.8412
GABPB1	-0.052	0.9493	-0.1109	0.01	0.9117
FAM129A	-0.0521	0.9492	-0.3525	0.12	0.7245
NEAT1	-0.0523	0.949	-0.4703	0.22	0.6381
HBA2	-0.053	0.9483	-0.5965	0.36	0.5508
SERF2	-0.0571	0.9445	-0.2441	0.06	0.8072
FKBP5	-0.061	0.9408	-0.4736	0.22	0.6358
HLA-DQA1	-0.0615	0.9403	-0.595	0.35	0.5519
CLK1	-0.0645	0.9376	-0.4114	0.17	0.6808
FOS	-0.0645	0.9375	-0.8032	0.65	0.4218
CCND3	-0.0664	0.9357	-0.3622	0.13	0.7172
ZC3H13	-0.0664	0.9357	-0.2582	0.07	0.7962
APOC1	-0.0692	0.9331	-1.2689	1.61	0.2045
EPC1	-0.0696	0.9328	-0.1604	0.03	0.8726
RPL36AL	-0.0706	0.9318	-0.2601	0.07	0.7948
H2AFV	-0.0713	0.9312	-0.2576	0.07	0.7967
PFDN5	-0.0716	0.9309	-0.2957	0.09	0.7674
FOSB	-0.0727	0.9298	-0.8826	0.78	0.3775
FCER1G	-0.0731	0.9295	-0.7342	0.54	0.4628
IL32	-0.0731	0.9295	-0.8548	0.73	0.3926
BAZ1B	-0.0735	0.9291	-0.3286	0.11	0.7425
IRF3	-0.0771	0.9258	-0.3475	0.12	0.7282
CD9	-0.0792	0.9239	-0.6268	0.39	0.5308
HLA-DRB1	-0.0801	0.9231	-0.8008	0.64	0.4232
MAPK1	-0.0852	0.9183	-0.3095	0.1	0.757
CD74	-0.0855	0.9181	-0.7234	0.52	0.4694
TAGAP	-0.0862	0.9174	-0.407	0.17	0.684
FOXN3	-0.0868	0.9169	-0.3561	0.13	0.7217
SMAP2	-0.0887	0.9151	-0.3914	0.15	0.6955
LBH	-0.089	0.9148	-0.5432	0.3	0.587
CRYAB	-0.091	0.913	-1.2989	1.69	0.194
MALAT1	-0.0964	0.9081	-0.7435	0.55	0.4572
SKAP1	-0.0974	0.9072	-0.8036	0.65	0.4216
CLU	-0.1	0.9049	-1.0222	1.04	0.3067
GOLGA8A	-0.1001	0.9048	-0.814	0.66	0.4157
GPSM3	-0.1016	0.9034	-0.7449	0.55	0.4563
KLRB1	-0.1062	0.8993	-0.6071	0.37	0.5438
SLTM	-0.1066	0.8989	-0.3605	0.13	0.7185
TSPO	-0.1123	0.8938	-0.5087	0.26	0.611
HLA-DRA	-0.1125	0.8936	-1.1196	1.25	0.2629
TYROBP	-0.1138	0.8924	-1.2561	1.58	0.2091
AHNAK	-0.1147	0.8917	-0.7065	0.5	0.4799
CD63	-0.1149	0.8915	-0.5433	0.3	0.5869
RPL21	-0.1191	0.8878	-0.507	0.26	0.6122
HSPA1A	-0.12	0.8869	-0.901	0.81	0.3676
CHCHD2	-0.1202	0.8868	-0.455	0.21	0.6491
UQCRH	-0.1226	0.8847	-0.5979	0.36	0.5499
HLA-DMA	-0.1233	0.884	-0.8546	0.73	0.3928
NKTR	-0.1236	0.8837	-0.7067	0.5	0.4798
VPS13C	-0.1249	0.8826	-0.4854	0.24	0.6274
MT-ND2	-0.127	0.8807	-0.8768	0.77	0.3806
TMEM59	-0.1286	0.8793	-0.4927	0.24	0.6222
NCF1	-0.1292	0.8788	-0.5914	0.35	0.5543
CMTM3	-0.13	0.8781	-0.9536	0.91	0.3403
DUT	-0.1308	0.8774	-0.4152	0.17	0.678
RFC1	-0.1318	0.8765	-0.4553	0.21	0.6489
COPS6	-0.1363	0.8726	-0.4594	0.21	0.646
HLA-DPA1	-0.1414	0.8682	-1.2479	1.56	0.2121
PSAP	-0.1418	0.8678	-0.6485	0.42	0.5166
UGP2	-0.1429	0.8668	-0.4184	0.18	0.6757
POMP	-0.1442	0.8657	-0.4766	0.23	0.6336
DIP2A	-0.1445	0.8654	-0.4484	0.2	0.6539
PCF11	-0.1453	0.8648	-0.5417	0.29	0.588
CHST12	-0.1484	0.8621	-0.3389	0.11	0.7347
PFN1	-0.1503	0.8604	-0.6524	0.43	0.5141
CHD2	-0.1509	0.8599	-0.4665	0.22	0.6409
CD84	-0.1547	0.8567	-0.7782	0.61	0.4364
TBCB	-0.1582	0.8537	-0.4296	0.18	0.6675
GPR65	-0.1598	0.8523	-0.5641	0.32	0.5727
MS4A6A	-0.1606	0.8516	-1.2345	1.52	0.217
OSTF1	-0.1627	0.8498	-0.5447	0.3	0.5859
RBPJ	-0.1631	0.8495	-0.3584	0.13	0.72
MT1E	-0.1639	0.8488	-2.0768	4.31	0.0378
HAVCR2	-0.1646	0.8483	-1.7097	2.92	0.0873
MYLIP	-0.1677	0.8456	-0.7922	0.63	0.4283
USMG5	-0.1678	0.8455	-0.7411	0.55	0.4587
CREBRF	-0.1751	0.8394	-0.5164	0.27	0.6056
CTSC	-0.1774	0.8374	-1.3927	1.94	0.1637
ANKRD44	-0.1781	0.8369	-0.6649	0.44	0.5061
CELF2	-0.1792	0.8359	-0.8657	0.75	0.3867
HLA-DPB1	-0.1828	0.8329	-1.6504	2.72	0.0989
C4orf48	-0.1832	0.8326	-1.6926	2.86	0.0905
NDFIP1	-0.1844	0.8316	-0.5693	0.32	0.5692
PSMA3-AS1	-0.1959	0.8221	-1.0235	1.05	0.3061
RPL17	-0.1968	0.8214	-0.7448	0.55	0.4564
CCL3L3	-0.1969	0.8212	-1.1516	1.33	0.2495
C19orf60	-0.1989	0.8196	-0.8895	0.79	0.3737
MRPL33	-0.2005	0.8183	-0.9462	0.9	0.344
S100A6	-0.2011	0.8178	-1.5525	2.41	0.1205
FAM96B	-0.2025	0.8167	-0.724	0.52	0.4691
MT-CO1	-0.2127	0.8084	-1.7042	2.9	0.0883
ABRACL	-0.2129	0.8082	-1.2108	1.47	0.226
GPX4	-0.2166	0.8053	-0.9119	0.83	0.3618
MT-ND1	-0.219	0.8033	-1.7432	3.04	0.0813
TRIM56	-0.226	0.7977	-0.8953	0.8	0.3706
UQCRB	-0.2303	0.7943	-0.9604	0.92	0.3369
RHOB	-0.2304	0.7942	-1.4347	2.06	0.1514
NPC2	-0.2313	0.7935	-1.0479	1.1	0.2947
MT-CO3	-0.2315	0.7933	-1.7142	2.94	0.0865
HMGN3	-0.2321	0.7928	-1.1779	1.39	0.2388
MT-ATP6	-0.2334	0.7918	-1.5981	2.55	0.11
AKAP9	-0.2337	0.7916	-1.1613	1.35	0.2455
WASF2	-0.234	0.7914	-0.9224	0.85	0.3563
MT-CYB	-0.2365	0.7894	-1.8618	3.47	0.0626
POLR2J3	-0.2397	0.7869	-0.4344	0.19	0.664
SYNE2	-0.24	0.7867	-1.5444	2.39	0.1225
EMP3	-0.2412	0.7857	-1.8499	3.42	0.0643
HLA-B	-0.243	0.7843	-1.6134	2.6	0.1067
GOLGB1	-0.2437	0.7837	-1.0175	1.04	0.3089
ARRB2	-0.2446	0.783	-1.207	1.46	0.2274
MRPS34	-0.2465	0.7816	-0.8803	0.77	0.3787
LINC00969	-0.2501	0.7787	-1.1376	1.29	0.2553
COX7A2	-0.2538	0.7759	-0.9934	0.99	0.3205
CRIP1	-0.2558	0.7743	-1.3178	1.74	0.1876
POLR3GL	-0.2597	0.7713	-0.6489	0.42	0.5164
ARGLU1	-0.2613	0.77	-1.7069	2.91	0.0878
RAC1	-0.2638	0.7681	-0.9768	0.95	0.3287
PSMD5-AS1	-0.2666	0.766	-1.179	1.39	0.2384
YWHAH	-0.2687	0.7644	-1.1397	1.3	0.2544
KLF6	-0.2693	0.7639	-1.498	2.24	0.1341
CAPG	-0.2698	0.7635	-2.2502	5.06	0.0244
ACTB	-0.28	0.7558	-0.8826	0.78	0.3775
LAMTOR5	-0.2807	0.7552	-1.0271	1.05	0.3044
COX17	-0.2915	0.7471	-1.2192	1.49	0.2228
DYNLT1	-0.2935	0.7456	-1.1824	1.4	0.237
PIK3IP1	-0.296	0.7438	-1.9182	3.68	0.0551
LAPTM4A	-0.2996	0.7411	-1.2347	1.52	0.217
HLA-F	-0.3001	0.7407	-1.7481	3.06	0.0805
IGFBP7	-0.3009	0.7401	-1.6771	2.81	0.0935
LSM3	-0.3047	0.7373	-0.9017	0.81	0.3672
TMA7	-0.3069	0.7357	-1.1625	1.35	0.245
GLUL	-0.315	0.7298	-1.3403	1.8	0.1802
NDUFB3	-0.3157	0.7293	-1.2165	1.48	0.2238
TRIM22	-0.3221	0.7247	-2.0213	4.09	0.0433
MYCBP2	-0.3266	0.7214	-1.2886	1.66	0.1975
HIST1H4C	-0.3308	0.7184	-0.3377	0.11	0.7356
TNFAIP8	-0.3344	0.7158	-1.7066	2.91	0.0879
UBE2D3	-0.3343	0.7158	-0.8827	0.78	0.3774
CBLB	-0.3405	0.7114	-1.0447	1.09	0.2962
NCOR1	-0.3411	0.711	-1.5051	2.27	0.1323
TNRC6B	-0.3419	0.7104	-1.1065	1.22	0.2685
PHYKPL	-0.3424	0.7101	-1.2246	1.5	0.2207
RTFDC1	-0.345	0.7082	-0.7113	0.51	0.4769
GPX1	-0.3481	0.706	-2.2649	5.13	0.0235
CYCS	-0.3523	0.7031	-1.8049	3.26	0.0711
COX6A1	-0.355	0.7012	-1.6704	2.79	0.0948
CYBA	-0.3589	0.6984	-2.8709	8.24	0.0041
DDX24	-0.3596	0.698	-1.1557	1.34	0.2478
DDX5	-0.3596	0.698	-1.6299	2.66	0.1031
CALM1	-0.3654	0.6939	-1.2126	1.47	0.2253
PPP1CA	-0.3674	0.6925	-0.8336	0.69	0.4045
MYL12A	-0.3806	0.6834	-1.3533	1.83	0.1759
CFLAR	-0.3808	0.6833	-1.3739	1.89	0.1695
ITM2B	-0.3829	0.6819	-1.8917	3.58	0.0585
APRT	-0.3989	0.6711	-1.74	3.03	0.0819
OCIAD2	-0.4017	0.6692	-3.0084	9.05	0.0026
MSI2	-0.4053	0.6668	-1.7633	3.11	0.0778
IPCEF1	-0.4074	0.6654	-1.2047	1.45	0.2283
NDUFC2	-0.4144	0.6607	-1.3035	1.7	0.1924
ATP6V0B	-0.4168	0.6591	-1.5824	2.5	0.1136
FRG1	-0.4192	0.6576	-1.2317	1.52	0.2181
COMMD6	-0.42	0.657	-1.4205	2.02	0.1555
NOSIP	-0.4212	0.6563	-1.1664	1.36	0.2435
ATP5F1	-0.4288	0.6513	-1.8531	3.43	0.0639
CCDC107	-0.4304	0.6503	-1.3079	1.71	0.1909
AIM1	-0.4335	0.6482	-2.352	5.53	0.0187
LINC00649	-0.4486	0.6385	-1.0592	1.12	0.2895
PSMB10	-0.4583	0.6324	-2.2258	4.95	0.026
YTHDC1	-0.4711	0.6243	-1.4753	2.18	0.1401
TNFRSF14	-0.472	0.6237	-2.9601	8.76	0.0031
LAMTOR4	-0.4857	0.6152	-1.9054	3.63	0.0567
MBP	-0.4868	0.6146	-1.7631	3.11	0.0779
DOCK8	-0.4891	0.6132	-2.4719	6.11	0.0134
SELT	-0.4954	0.6093	-1.3527	1.83	0.1762
RORA	-0.5031	0.6047	-1.9638	3.86	0.0496
NDUFA11	-0.5072	0.6022	-1.8433	3.4	0.0653
NDUFA4	-0.5118	0.5994	-2.3455	5.5	0.019
NAA38	-0.513	0.5987	-2.0847	4.35	0.0371
PARP8	-0.514	0.5981	-1.722	2.97	0.0851
SELK	-0.5284	0.5896	-1.6518	2.73	0.0986
SVIP	-0.5318	0.5875	-1.7606	3.1	0.0783
CST3	-0.5338	0.5864	-2.6273	6.9	0.0086
MAP4	-0.5482	0.578	-1.5568	2.42	0.1195
TBC1D4	-0.5533	0.5751	-3.4883	12.17	0.0005
ATP6V1F	-0.5572	0.5728	-2.6904	7.24	0.0071
CMC1	-0.5753	0.5625	-1.1827	1.4	0.2369
DDB2	-0.5754	0.5625	-3.7167	13.81	0.0002
GNB2	-0.591	0.5538	-2.1759	4.73	0.0296
SEPW1	-0.6066	0.5452	-1.9778	3.91	0.048
GLG1	-0.607	0.545	-2.0049	4.02	0.045
PPDPF	-0.6137	0.5413	-3.179	10.11	0.0015
HNRNPA1L2	-0.6183	0.5388	-1.7625	3.11	0.078
ATP5L	-0.6215	0.5371	-2.1116	4.46	0.0347
HERPUD1	-0.6226	0.5366	-2.5307	6.4	0.0114
NDUFB2	-0.6386	0.528	-2.7489	7.56	0.006
POLR2L	-0.645	0.5247	-2.5182	6.34	0.0118
FKBP2	-0.6553	0.5193	-2.7221	7.41	0.0065
POLR2E	-0.6594	0.5172	-1.806	3.26	0.0709
ANKRD11	-0.6595	0.5171	-1.8506	3.42	0.0642
COX4I1	-0.663	0.5153	-3.2477	10.55	0.0012
PEBP1	-0.6661	0.5137	-2.9951	8.97	0.0027
CNDP2	-0.6836	0.5048	-4.9762	24.76	0
ZMYM2	-0.6864	0.5034	-2.4052	5.79	0.0162
C4orf3	-0.6941	0.4995	-2.4164	5.84	0.0157
ACADVL	-0.7028	0.4952	-3.4606	11.98	0.0005
PTPRA	-0.7031	0.495	-1.881	3.54	0.06
PSMB6	-0.7301	0.4818	-2.5904	6.71	0.0096
PARK7	-0.7347	0.4797	-2.0885	4.36	0.0367
AAK1	-0.7411	0.4766	-1.9303	3.73	0.0536
BRK1	-0.7467	0.4739	-2.1683	4.7	0.0301
NAP1L4	-0.7675	0.4642	-2.0001	4	0.0455
AURKAIP1	-0.7864	0.4555	-3.0199	9.12	0.0025
SAFB2	-0.8683	0.4197	-2.6145	6.84	0.0089
ILF3-AS1	-0.8859	0.4123	-4.0583	16.47	0
SMDT1	-0.8983	0.4073	-3.601	12.97	0.0003
MYL12B	-1.0638	0.3451	-3.2534	10.58	0.0011
MINOS1	-1.4999	0.2232	-4.8459	23.48	0
TCF25	-1.8038	0.1647	-4.7347	22.42	0
ADIRF	-37.455	0	-1.4797	2.19	0.1389
XBP1	NA	NA	NA	NA	NA
