# Supplementary material for: The Identification of a Tumor Infiltration CD8+ T-Cell Gene Signature That Can Potentially Improve the Prognosis and Prediction of Immunization Responses in Papillary Renal Cell Carcinoma
Source: Front Oncol. 2021 Nov 10;11:757641. doi: 10.3389/fonc.2021.757641 (PMC8631402; doi:10.3389/fonc.2021.757641)
Supplement: Supplementary Data Sheet 7 — Supporting data for type2 parRCC. [file DataSheet_7.csv]

	Sample.ID	Tumor.Type
1	TCGA-2Z-A9J2-01	Type 2
2	TCGA-2Z-A9J3-01	Type 2
3	TCGA-2Z-A9J5-01	Type 2
5	TCGA-2Z-A9J8-01	Type 2
7	TCGA-2Z-A9JD-01	Type 2
9	TCGA-2Z-A9JG-01	Type 2
10	TCGA-2Z-A9JJ-01	Type 2
11	TCGA-2Z-A9JK-01	Type 2
14	TCGA-2Z-A9JP-01	Type 2
15	TCGA-2Z-A9JR-01	Type 2
16	TCGA-2Z-A9JS-01	Type 2
17	TCGA-2Z-A9JT-01	Type 2
18	TCGA-5P-A9JU-01	Type 2
19	TCGA-5P-A9JW-01	Type 2
23	TCGA-5P-A9K3-01	Type 2
29	TCGA-5P-A9KE-01	Type 2
31	TCGA-A4-7288-01	Type 2
34	TCGA-A4-7585-01	Type 2
43	TCGA-A4-8517-01	Type 2
44	TCGA-A4-A48D-01	Type 2
47	TCGA-A4-A5Y0-01	Type 2
48	TCGA-A4-A5Y1-01	Type 2
50	TCGA-A4-A7UZ-01	Type 2
54	TCGA-AL-3473-01	Type 2
55	TCGA-AL-7173-01	Type 2
56	TCGA-AL-A5DJ-01	Type 2
57	TCGA-B1-5398-01	Type 2
59	TCGA-B1-A47M-01	Type 2
61	TCGA-B1-A47O-01	Type 2
63	TCGA-B1-A655-01	Type 2
64	TCGA-B1-A656-01	Type 2
67	TCGA-B9-4117-01	Type 2
68	TCGA-B9-7268-01	Type 2
69	TCGA-B9-A44B-01	Type 2
71	TCGA-B9-A69E-01	Type 2
73	TCGA-B9-A8YI-01	Type 2
74	TCGA-BQ-5876-01	Type 2
75	TCGA-BQ-5878-01	Type 2
76	TCGA-BQ-5880-01	Type 2
77	TCGA-BQ-5881-01	Type 2
78	TCGA-BQ-5884-01	Type 2
79	TCGA-BQ-5887-01	Type 2
80	TCGA-BQ-5894-01	Type 2
81	TCGA-BQ-7058-01	Type 2
82	TCGA-BQ-7060-01	Type 2
83	TCGA-BQ-7061-01	Type 2
84	TCGA-BQ-7062-01	Type 2
96	TCGA-EV-5901-01	Type 2
98	TCGA-F9-A4JJ-01	Type 2
99	TCGA-F9-A7Q0-01	Type 2
101	TCGA-F9-A8NY-01	Type 2
102	TCGA-F9-A97G-01	Type 2
103	TCGA-G7-6789-01	Type 2
105	TCGA-G7-6793-01	Type 2
106	TCGA-G7-7501-01	Type 2
108	TCGA-G7-A8LC-01	Type 2
111	TCGA-GL-7966-01	Type 2
112	TCGA-GL-8500-01	Type 2
113	TCGA-GL-A4EM-01	Type 2
118	TCGA-GL-A9DE-01	Type 2
119	TCGA-HE-7128-01	Type 2
120	TCGA-HE-7129-01	Type 2
123	TCGA-HE-A5NI-01	Type 2
127	TCGA-KV-A6GD-01	Type 2
129	TCGA-KV-A74V-01	Type 2
130	TCGA-MH-A560-01	Type 2
135	TCGA-P4-A5E6-01	Type 2
136	TCGA-P4-A5E7-01	Type 2
137	TCGA-P4-A5E8-01	Type 2
138	TCGA-P4-A5EA-01	Type 2
139	TCGA-P4-A5EB-01	Type 2
140	TCGA-P4-A5ED-01	Type 2
141	TCGA-P4-AAVK-01	Type 2
142	TCGA-P4-AAVL-01	Type 2
143	TCGA-P4-AAVM-01	Type 2
144	TCGA-P4-AAVO-01	Type 2
145	TCGA-PJ-A5Z8-01	Type 2
146	TCGA-Q2-A5QZ-01	Type 2
150	TCGA-SX-A7SM-01	Type 2
152	TCGA-SX-A7SS-01	Type 2
153	TCGA-V9-A7HT-01	Type 2
154	TCGA-WN-A9G9-01	Type 2
157	TCGA-Y8-A897-01	Type 2
160	TCGA-Y8-A8RZ-01	Type 2
162	TCGA-Y8-A8S1-01	Type 2
